# Supplementary material for: Effects of precipitation changes on soil bacterial community composition and diversity in the Junggar desert of Xinjiang, China
Source: PeerJ. 2020 Jan 27;8:e8433. doi: 10.7717/peerj.8433 (PMC6991129; doi:10.7717/peerj.8433)
Supplement: Data S1 [file peerj-08-8433-s001.xlsx]

## Sheet: Raw data--alpha_diversity_index
Sample name	shannon Wiener index	simpson index	chao1
-0.6	9.045	0.994	2271.25
	8.9	0.99	2225.49
	8.505	0.99	1972.68
-0.3	9.258	0.995	2572.6
	9.104	0.995	2431.28
	8.896	0.992	2167.7
CK	9.351	0.995	2446.79
	9.442	0.995	2643.97
	9.11	0.995	2325.03
0.3	8.963	0.992	2283.67
	9.5	0.996	2620.03
	9.164	0.994	2486.24
0.6	9.272	0.995	2349.23
	9.532	0.996	2666.57
	9.451	0.996	2495.27
