# Supplementary material for: Effects of precipitation changes on soil bacterial community composition and diversity in the Junggar desert of Xinjiang, China
Source: PeerJ. 2020 Jan 27;8:e8433. doi: 10.7717/peerj.8433 (PMC6991129; doi:10.7717/peerj.8433)
Supplement: Data S2 [file peerj-08-8433-s002.xlsx]

## Sheet: Sheet1
Taxonomy	Bacteroidetes	Actinobacteria	Proteobacteria	Oxyphotobacteria	Acidobacteria	Chloroflexi	Firmicutes	Gemmatimonadetes	Fusobacteria	Thaumarchaeota	Others
-0.6	0.146195	0.423325	0.16444	0.0160796	0.0526483	0.0872366	0.0366742	0.0238422	0.000132017	0.00409252	0.0453345
	0.159793	0.238765	0.200665	0.0933622	0.118155	0.0730316	0.0126472	0.0306807	5.28067e-05	0.0105613	0.0622855
	0.298701	0.211464	0.225009	0.0590907	0.0546549	0.0579025	0.00646882	0.0263505	7.921e-05	0.000686487	0.0595923
-0.3	0.239901	0.285711	0.232429	0.00295717	0.0613085	0.0651898	0.0492686	0.0222844	0.000343243	0.00063368	0.0399747
	0.127185	0.380604	0.204494	0.028542	0.0877647	0.0818767	0.0127792	0.0277235	2.64033e-05	0.00718171	0.0418229
	0.26802	0.292438	0.23499	0.0156572	0.0467603	0.0584834	0.0241591	0.023499	0.00108254	0.00300998	0.0320008
CK	0.165311	0.274199	0.215451	0.0345356	0.113297	0.0722131	0.0179543	0.0554998	0	0.00638961	0.0451497
	0.209405	0.26707	0.270476	0.00800021	0.0927549	0.0722395	0.00987485	0.0273539	7.921e-05	0.00282516	0.0399218
	0.156044	0.315546	0.160532	0.031684	0.0774674	0.115911	0.0593811	0.0228389	0.00055447	0.00211227	0.0579289
+30%	0.23726	0.291097	0.213867	0.00726092	0.0579553	0.0818503	0.0314728	0.0310767	0.000105613	0.00512225	0.0429318
	0.18749	0.272958	0.239135	0.0101653	0.115462	0.0580873	0.00763056	0.0531763	0	0.0101125	0.0457834
	0.216613	0.236046	0.271532	0.0689391	0.0719227	0.0537836	0.00570312	0.0321857	2.64033e-05	0.00675925	0.0364894
+60%	0.251122	0.233168	0.206765	0.0257169	0.0786291	0.0642393	0.0192216	0.059962	0	0.00245551	0.058721
	0.13273	0.339124	0.198527	0.015974	0.0694144	0.0866029	0.0506416	0.0376248	0.0015842	0.0242119	0.0435655
	0.206923	0.283572	0.231056	0.0152083	0.111448	0.0571632	0.00810582	0.0467339	0	0.00451497	0.0352749
