# Supplementary material for: Effects of precipitation changes on soil bacterial community composition and diversity in the Junggar desert of Xinjiang, China
Source: PeerJ. 2020 Jan 27;8:e8433. doi: 10.7717/peerj.8433 (PMC6991129; doi:10.7717/peerj.8433)
Supplement: Data S3 [file peerj-08-8433-s003.xlsx]

## Sheet: Sheet1
	Richness	Shannon-Wiener index	Pielou index	Simpson index
-0.6	7	1.28765	0.674412	0.480753
	6	1.24223	0.820354	0.379108
	4	1.15732	0.596829	0.295435
-0.3	8	1.46011	0.734236	0.532556
	7	1.39609	0.912734	0.370495
	7	1.39014	0.809048	0.376375
CK	6	1.34588	0.720945	0.295378
	7	1.41333	0.602344	0.283028
	7	1.44623	0.555089	0.287201
+30%	6	1.33446	0.628821	0.317812
	7	1.42699	0.876022	0.270605
	8	1.60217	0.910636	0.296651
+60%	9	1.80472	0.635803	0.158153
	6	1.47159	0.838814	0.248179
	9	1.8075	0.923833	0.286851
