# Supplementary material for: Effects of precipitation changes on soil bacterial community composition and diversity in the Junggar desert of Xinjiang, China
Source: PeerJ. 2020 Jan 27;8:e8433. doi: 10.7717/peerj.8433 (PMC6991129; doi:10.7717/peerj.8433)
Supplement: Data S4 [file peerj-08-8433-s004.xlsx]

## Sheet: Sheet1
	SWC	pH	TN	TP	TK	AN	AP	AK
-0.6	0.0256561	9.615	0.119	0.574	19.8315	11.265	8.7575	261
	0.0253391	9.14	0.279	0.5655	19.9405	10.94	7.892	261
	0.0170354	9.545	0.2385	0.547	17.343	17.475	7.779	202
-0.3	0.0289272	9.16	0.165	0.559	19.8505	9.96	7.144	304.5
	0.0407853	9.13	0.3385	0.5815	19.8165	16.82	9.3335	290
	0.0341297	9.29	0.1995	0.5425	19.7235	17.885	7.2915	214
CK	0.0329967	9.05	0.183	0.539	20.125	12.005	7.8235	210
	0.0352923	9.465	0.2765	0.505	20.0475	19.515	6.0665	230
	0.0358749	9.195	0.302	0.5355	18.8825	14.535	6.4655	192.5
+30%	0.0512725	9.38	0.143	0.4915	18.841	10.945	6.244	315
	0.0502139	9.51	0.3535	0.554	18.929	8.245	7.449	256
	0.0405786	9.785	0.277	0.579	18.642	26.375	7.09	223.5
+60%	0.0299389	9.995	0.2135	0.479	19.418	6.78	6.475	151.5
	0.0607078	9.22	0.293	0.614	19.8855	19.76	9.427	251
	0.0400438	9.13	0.292	0.548	19.394	13.965	6.382	177
